# Supplementary material
Source: PubMed Central journal article supplement (PMC8190171)
Supplement: 253_2021_11382_MOESM1_ESM.pdf [file 253_2021_11382_MOESM1_ESM.pdf]

Ms. No. AMAB-D-21-00689  
 Applied Microbiology and Biotechnology

## The Microbiology of the American Smokeless Tobacco

Rivera, A.J. †, and Tyx, R.E.

### Affiliations

1. Centers for Disease Control and Prevention

### †Corresponding Author

Centers for Disease Control and Prevention  
 4770 Buford Highway, NE MS 110-03  
 Atlanta, GA 30341-3717  
 Email: [yic7@cdc.gov](mailto:yic7@cdc.gov)  
 ORCID: 0000-0002-0715-6273

### Supplemental Table 1

| Publication | Shared Taxa | Species                                                                                                                                                                                                                                                                                                                                                                                                                                                                                                                                                                                                                                                                        |
|-------------|-------------|--------------------------------------------------------------------------------------------------------------------------------------------------------------------------------------------------------------------------------------------------------------------------------------------------------------------------------------------------------------------------------------------------------------------------------------------------------------------------------------------------------------------------------------------------------------------------------------------------------------------------------------------------------------------------------|
| A B C D E   | 1           | <i>Bacillus</i>                                                                                                                                                                                                                                                                                                                                                                                                                                                                                                                                                                                                                                                                |
| B C D E     | 3           | <i>Corynebacterium, Brachybacterium, Enterococcus</i>                                                                                                                                                                                                                                                                                                                                                                                                                                                                                                                                                                                                                          |
| A B C       | 1           | <i>Paenibacillus</i>                                                                                                                                                                                                                                                                                                                                                                                                                                                                                                                                                                                                                                                           |
| A C E       | 1           | <i>Oceanobacillus</i>                                                                                                                                                                                                                                                                                                                                                                                                                                                                                                                                                                                                                                                          |
| B C E       | 1           | <i>Pseudomonas</i>                                                                                                                                                                                                                                                                                                                                                                                                                                                                                                                                                                                                                                                             |
| B D E       | 6           | <i>Acetobacter, Staphylococcus, Cellulosimicrobium, Aerococcus, Lactobacillus, Tetragenococcus</i>                                                                                                                                                                                                                                                                                                                                                                                                                                                                                                                                                                             |
| C D E       | 1           | <i>Brevibacterium</i>                                                                                                                                                                                                                                                                                                                                                                                                                                                                                                                                                                                                                                                          |
| B C         | 3           | <i>Methylobacterium, Mycobacterium, Pantoea</i>                                                                                                                                                                                                                                                                                                                                                                                                                                                                                                                                                                                                                                |
| B D         | 4           | <i>Xanthomonas, Streptomyces, Propionibacterium, Shewanella</i>                                                                                                                                                                                                                                                                                                                                                                                                                                                                                                                                                                                                                |
| B E         | 8           | <i>Carnobacterium, Leucobacter, Granulicatella, Acinetobacter, Microbacterium, Halomonas, Enterobacter, Alicyclobacillus</i>                                                                                                                                                                                                                                                                                                                                                                                                                                                                                                                                                   |
| C D         | 2           | <i>Arthrobacter, Stenotrophomonas</i>                                                                                                                                                                                                                                                                                                                                                                                                                                                                                                                                                                                                                                          |
| C E         | 2           | <i>Sphingobacterium, Sphingobium</i>                                                                                                                                                                                                                                                                                                                                                                                                                                                                                                                                                                                                                                           |
| D E         | 2           | <i>Facklamia, Ralstonia</i>                                                                                                                                                                                                                                                                                                                                                                                                                                                                                                                                                                                                                                                    |
| A           | 1           | <i>Terribacillus</i>                                                                                                                                                                                                                                                                                                                                                                                                                                                                                                                                                                                                                                                           |
|             |             | <i>Thermoanaerobacterium, Meiothermus, Anaerococcus, Streptococcus, Heliobacterium, Azospirillum, Brevundimonas, Alkalibacterium, Salmonella, Micrococcus, Gemella, Actinomyces, Kineococcus, Geodermatophilus, Caldicellusiruptor, Geobacillus, Scardovia, Turicella, Abiotrophia, Thermus, Shigella, Deinococcus, Beutenbergia, Peptoniphilus, Leifsonia, Listeria, Magnetospirillum, Brevibacillus, Phyllobacterium, Finegoldia, Kocuria, Sporolactobacillus, Rhodococcus, Rubrobacter, Paracoccus, Clostridium, Pseudoramibacter, Ruminococcus, Aeromonas, Duganella, Curvibacter, Synechococcus, Fusobacterium, Chlorobaculum, Eubacterium, Tropheryma, Pannonibacter</i> |
| C           | 13          | <i>Singulisphaera, Ochrobactrum, Bdellovibrio, Agaricicola, Patulibacter, Jeotgalicoccus, Glycomyces, Gemmatimonas, Aquicella, Luteolibacter, Nocardioides, Devosia, Bosea,</i>                                                                                                                                                                                                                                                                                                                                                                                                                                                                                                |
|             |             | <i>Atopostipes, Marinilactibacillus, Acidovorax, Lactigenium, Enteractinococcus, Planomicrobium, Pelomonas, Burkholderia, Delftia, Bacteroides, Kurthia, Weissella, Comamonas, Bradyrhizobium, Cloacibacterium, Massilia, Atopococcus, Undibacterium</i>                                                                                                                                                                                                                                                                                                                                                                                                                       |
| E           | 6           | <i>Lentibacillus, Zhouia, Erwinia, Alloiococcus, Lampropedia, Agrobacterium</i>                                                                                                                                                                                                                                                                                                                                                                                                                                                                                                                                                                                                |

A) Al-hebsiet.al. , B) Han, C) Law, D) Smyth, E) Tyx
